# Supplementary figures and images for: Cutaneous Mucormycosis in Buffalos in the Brazilian Amazon Biome
Source: MDPI journal article supplement (doi:10.3390/ani14091327), 2024-04-29

**Figure S1:** The PCR experiment results after running the gel electrophoresis with a 2% agarose gel.

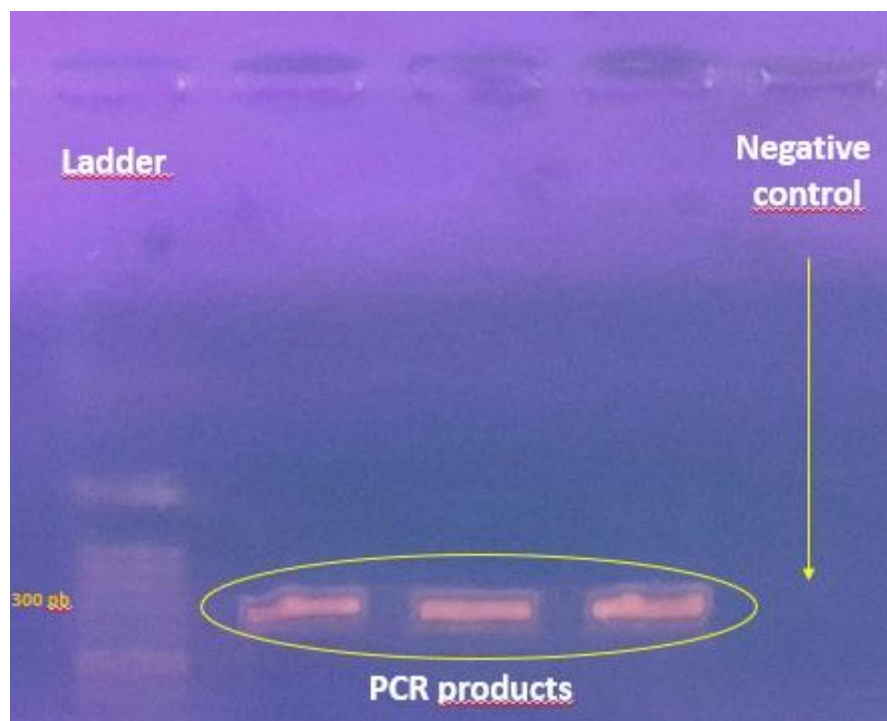

Supplement: s1 [file s1]
